# Supplementary material
Source: publisher figshare collection journal article supplement (https://acs.figshare.com/ndownloader/files/6413097)
Supplement: Supplementary file 1 [file 6413097]

## Supporting Information

# Formation and Scrolling Behavior of Metal Fluoride and Oxyfluoride Nanosheets

*Roshini Ramachandran,<sup>‡</sup> Darrah Johnson-McDaniel,<sup>‡</sup> and Tina T. Salguero<sup>\*</sup>*

Department of Chemistry, The University of Georgia, 140 Cedar Street, Athens, GA 30602 USA

### Contents:

|                                                                                                                                                                                                                                           |                |
|-------------------------------------------------------------------------------------------------------------------------------------------------------------------------------------------------------------------------------------------|----------------|
| <b>Figure S1.</b> Size distribution of the rectangular $\text{CaF}_2$ nanosheets: a) Representative TEM image. b) Histogram of nanosheet lateral dimensions.                                                                              | <b>Page S2</b> |
| <b>Figure S2.</b> HRTEM imaging showing the mixed morphology of the $\text{CaF}_2$ nanoproduc: rectangular nanosheets plus irregular nanoparticles.                                                                                       | <b>Page S2</b> |
| <b>Figure S3.</b> Solution-state $^{19}\text{F}$ NMR of the $\text{CaSi}_2 + \text{HF}(\text{aq})$ reaction mixture.                                                                                                                      | <b>Page S3</b> |
| <b>Figure S4.</b> SAED of the $\text{CaF}_2$ nanosheets showing polycrystalline rings indexed to $\text{CaF}_2$ .                                                                                                                         | <b>Page S3</b> |
| <b>Figure S5.</b> AFM data for $\text{CaF}_2$ nanosheets showing that the thickness ranges from 0.6-1 nm.                                                                                                                                 | <b>Page S4</b> |
| <b>Figure S6.</b> SEM images of $\text{CaSi}_2$ before reacting with HF (left) and partially reacted $\text{CaSi}_2$ after reaction with HF (right) showing lateral cracking due to partial removal of $\text{Ca}^{2+}$ by $\text{F}^-$ . | <b>Page S4</b> |
| <b>Figure S7.</b> TEM image of a sparse $\text{CaF}_2$ platelet formed during the reaction of $\text{CaSi}_2 + \text{HF}_{(\text{aq})}$ .                                                                                                 | <b>Page S5</b> |
| <b>Figure S8.</b> Circled clusters of nanoparticles surrounding a $\text{LaF}_{3-2x}\text{O}_x$ nanoscroll.                                                                                                                               | <b>Page S5</b> |
| <b>Figure S9.</b> SAED of $\text{LaF}_{3-2x}\text{O}_x$ nanoscrolls showing polycrystalline rings indexed to $\text{LaF}_3$ .                                                                                                             | <b>Page S6</b> |
| <b>Figure S10.</b> Measurement of $\text{LaF}_{3-2x}\text{O}_x$ nanoscroll diameter from STEM image.                                                                                                                                      | <b>Page S6</b> |
| <b>Figure S11.</b> TEM image of the lanthanum fluoride nanoscrolls using $\text{La}(\text{CF}_3\text{SO}_3)_3$ .                                                                                                                          | <b>Page S7</b> |
| <b>Figure S12.</b> STEM image of the lanthanum fluoride nanoscrolls using $\text{LaBr}_3$ .                                                                                                                                               | <b>Page S7</b> |
| <b>Figure S13.</b> TEM image of partially scrolled nanosheets.                                                                                                                                                                            | <b>Page S8</b> |
| <b>Figure S14.</b> HRTEM images of partially rolled and fully rolled nanoscrolls.                                                                                                                                                         | <b>Page S8</b> |
| <b>Figure S15.</b> TEM and PXRD data for $\text{LaF}_3$ nanocrystals obtained from the hydrothermal reaction of $\text{CaF}_2$ nanosheets with $\text{LaCl}_3$ .                                                                          | <b>Page S9</b> |
| <b>Table S1.</b> Scherrer analysis of $\text{CaF}_2$ nanosheets and $\text{LaF}_{3-2x}\text{O}_x$ nanoscrolls.                                                                                                                            | <b>Page S4</b> |
| <b>Table S2.</b> Relative intensities of the $^{19}\text{F}$ resonances from the $\text{CaF}_2$ nanosheet sample.                                                                                                                         | <b>Page S5</b> |
| <b>Table S3.</b> Quantitative EDS measurements on the $\text{LaF}_{3-2x}\text{O}_x$ nanoscrolls.                                                                                                                                          | <b>Page S9</b> |
| <b>Table S4.</b> Peak values for XPS measurements.                                                                                                                                                                                        | <b>Page S9</b> |

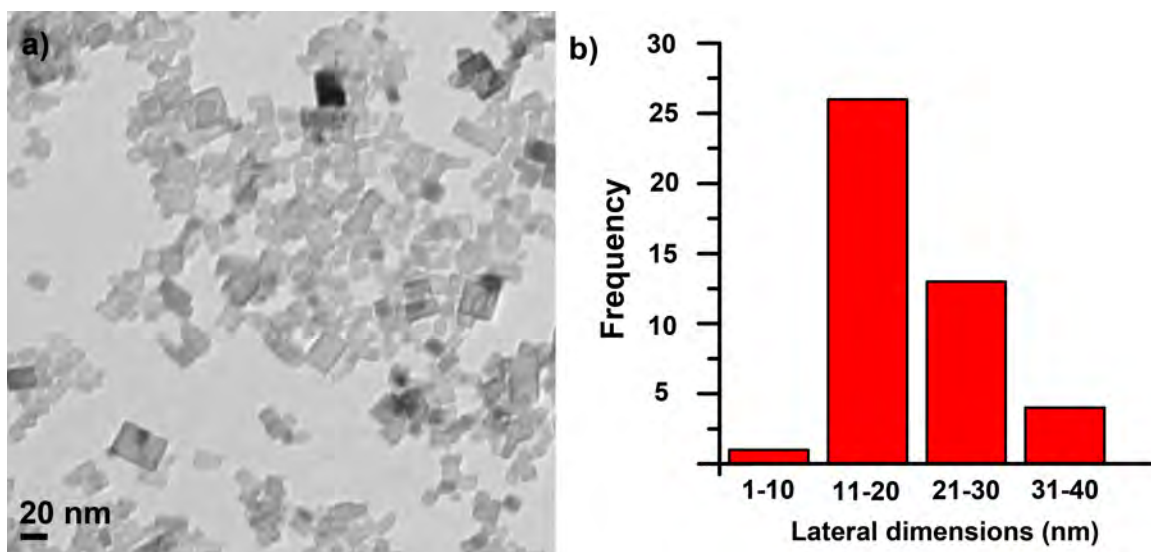

**Figure S1.** Size distribution of the rectangular  $\text{CaF}_2$  nanosheets: a) Representative TEM image. b) Histogram of nanosheet lateral dimensions; the average size is 17-22 nm.

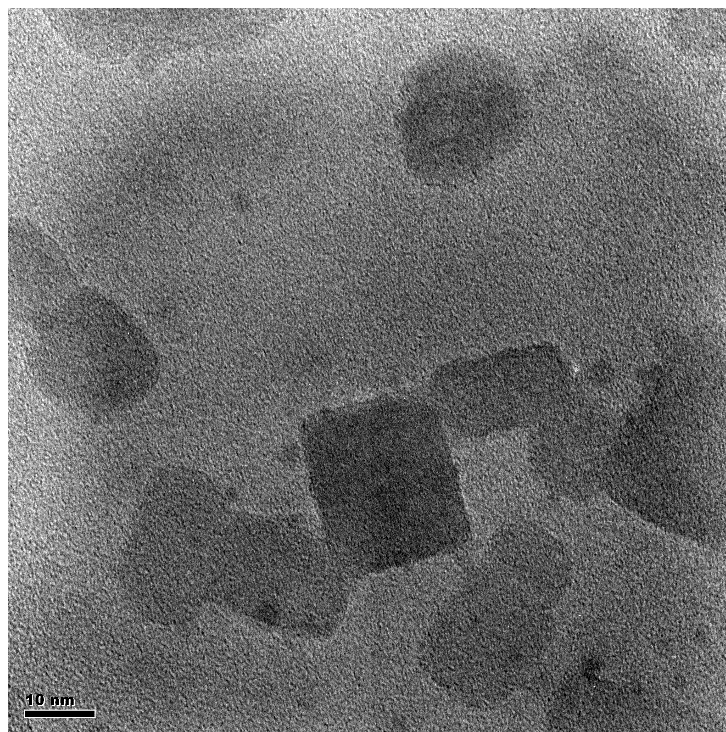

**Figure S2.** HRTEM imaging showing the mixed morphology of the  $\text{CaF}_2$  nanoprodut: rectangular nanosheets plus irregular nanoparticles.

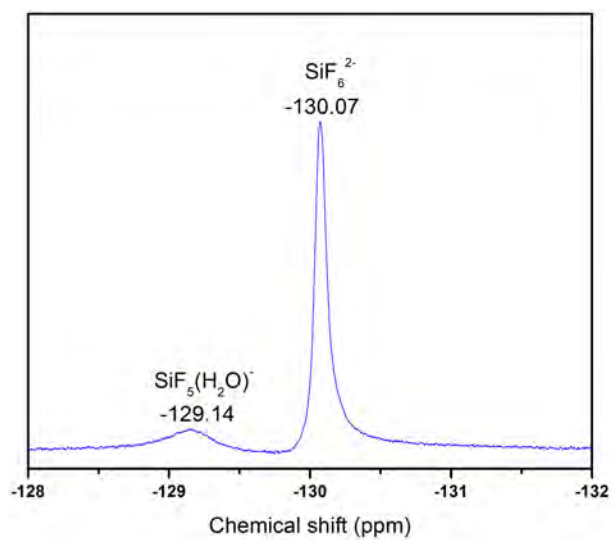

**Figure S3.** Solution-state  $^{19}\text{F}$  NMR of the  $\text{CaSi}_2 + \text{HF}(\text{aq})$  reaction mixture.

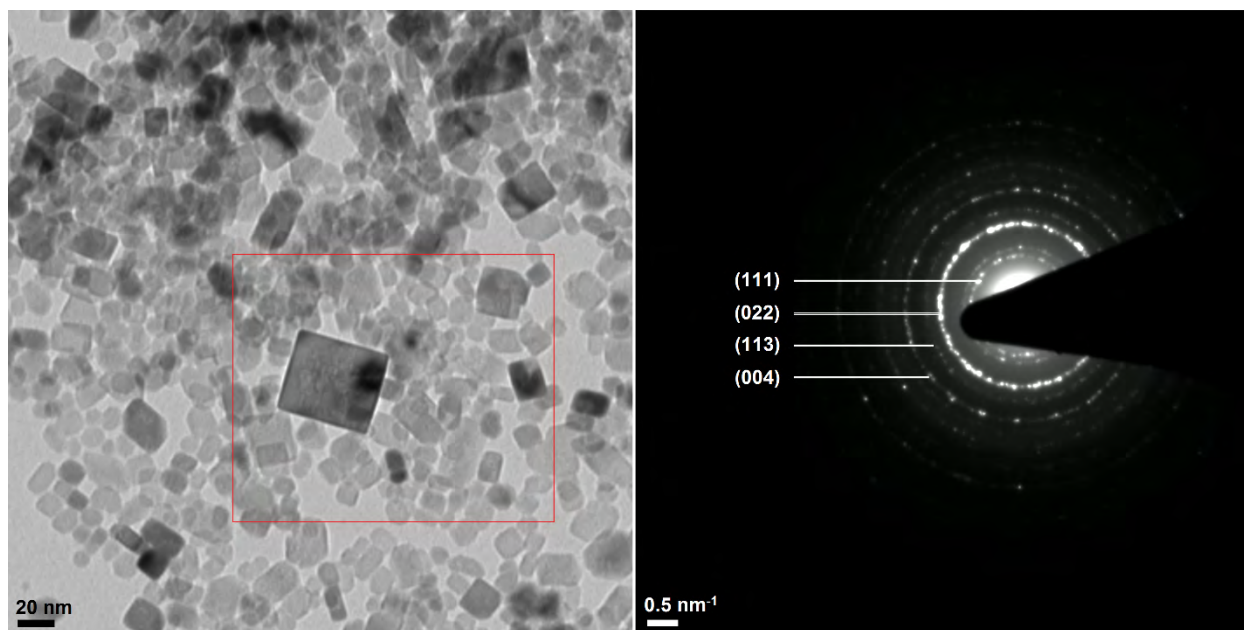

**Figure S4.** SAED of the  $\text{CaF}_2$  nanosheets showing polycrystalline rings indexed to  $\text{CaF}_2$

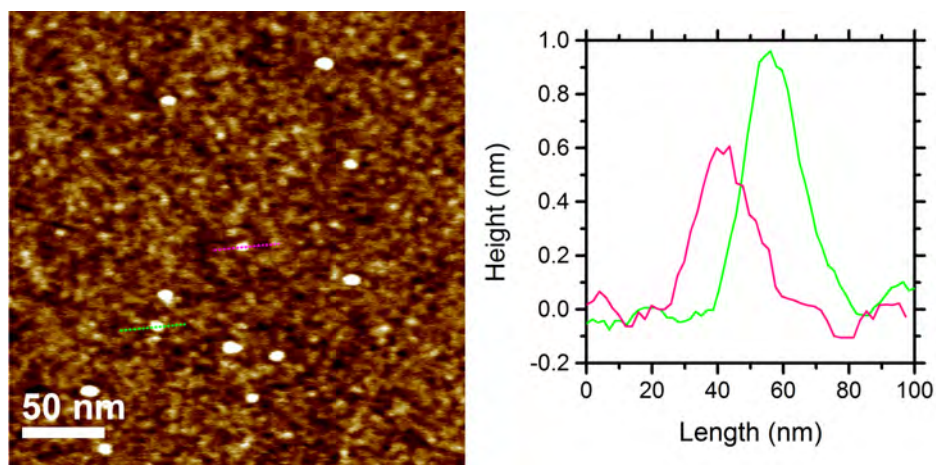

**Figure S5.** AFM data for  $\text{CaF}_2$  nanosheets; their thicknesses range from 0.6 to 1 nm.

**Table S1.** Scherrer analysis of  $\text{CaF}_2$  nanosheets and  $\text{LaF}_{3-2x}\text{O}_x$  nanoscrolls (shape parameter 0.9).

|                                                             | Peak used            | 2-theta (degrees) | FWHM   | Particle size (nm) | Average size (nm) |
|-------------------------------------------------------------|----------------------|-------------------|--------|--------------------|-------------------|
| <b><math>\text{CaF}_2</math> nanosheets</b>                 | $\text{CaF}_2$ (111) | 32.97             | 0.4154 | 24.20              | 22.37             |
|                                                             | $\text{CaF}_2$ (220) | 55.20             | 0.5018 | 21.68              |                   |
|                                                             | $\text{CaF}_2$ (311) | 65.87             | 0.5410 | 21.23              |                   |
| <b><math>\text{LaF}_{3-2x}\text{O}_x</math> nanoscrolls</b> | $\text{LaF}_3$ (002) | 28.02             | 0.9942 | 9.99               | 22.84             |
|                                                             | $\text{LaF}_3$ (111) | 32.12             | 0.3060 | 32.78              |                   |
|                                                             | $\text{LaF}_3$ (300) | 51.00             | 0.4146 | 25.76              |                   |

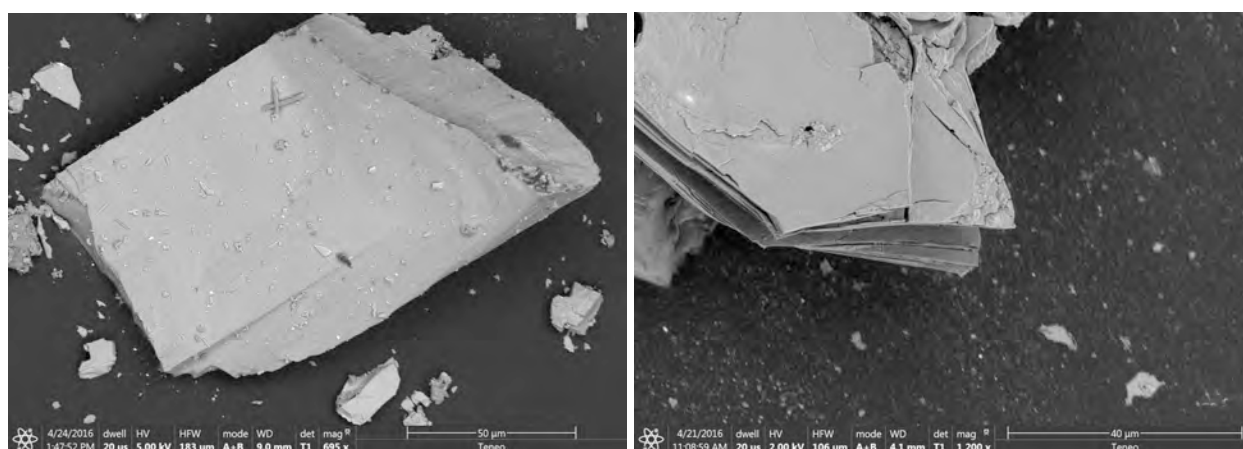

**Figure S6.** SEM images of  $\text{CaSi}_2$  before reacting with HF (left) and partially reacted  $\text{CaSi}_2$  after reaction with HF (right) showing lateral cracking due to partial removal of  $\text{Ca}^{2+}$  by  $\text{F}^-$ .

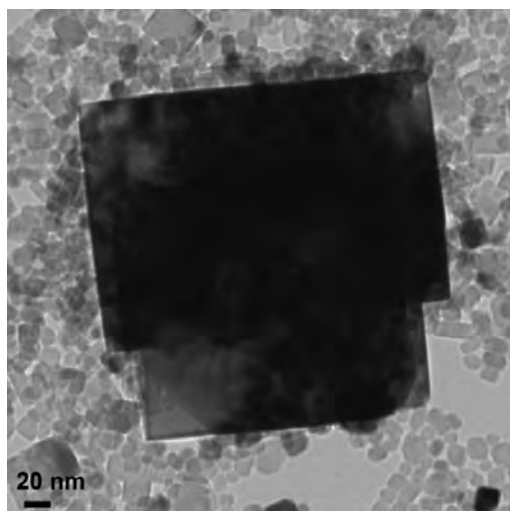

**Figure S7.** TEM image of a sparse  $\text{CaF}_2$  platelet formed during the reaction of  $\text{CaSi}_2 + \text{HF}(\text{aq})$ .

**Table S2.** Relative intensities of the  $^{19}\text{F}$  resonances from the  $\text{CaF}_2$  nanosheet sample.

| $\delta_{\text{iso}}$ (ppm) | Relative intensity |
|-----------------------------|--------------------|
| -108.1                      | 83.3%              |
| -82.8                       | 5.0%               |
| -122.6                      | 2.1%               |
| -127.4                      | 4.5%               |
| -133.4                      | 5.1%               |

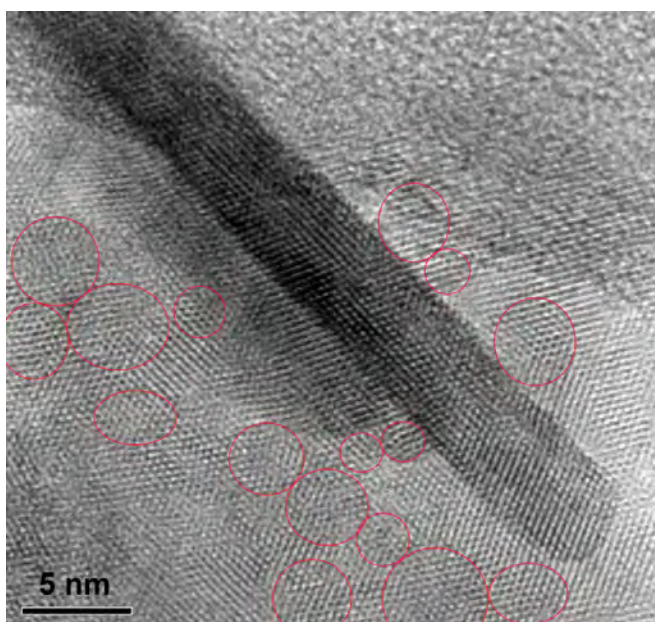

**Figure S8.** Circled clusters of nanoparticles surrounding a  $\text{LaF}_{3-2x}\text{O}_x$  nanoscroll.



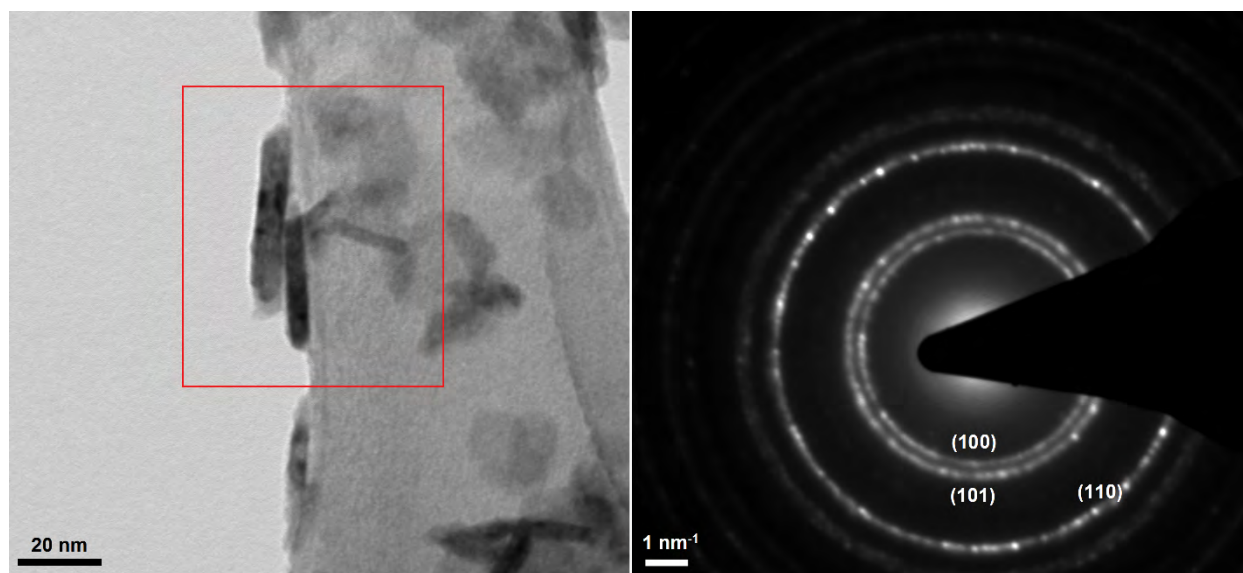

**Figure S9.** SAED of the  $\text{LaF}_{3-2x}\text{O}_x$  nanoscrolls showing polycrystalline rings indexed to  $\text{LaF}_3$ .

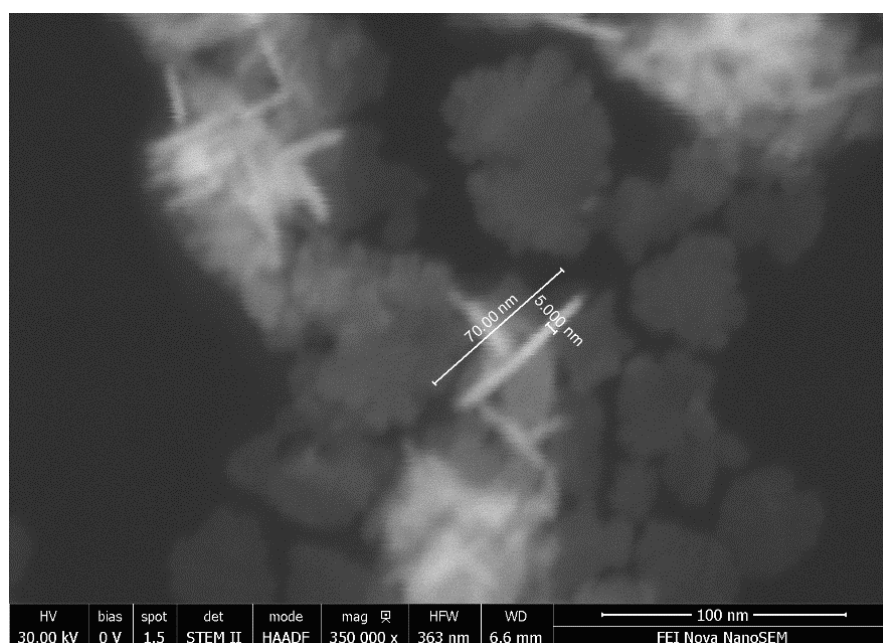

**Figure S10.** Measurement of  $\text{LaF}_{3-2x}\text{O}_x$  nanoscroll diameter from STEM image.

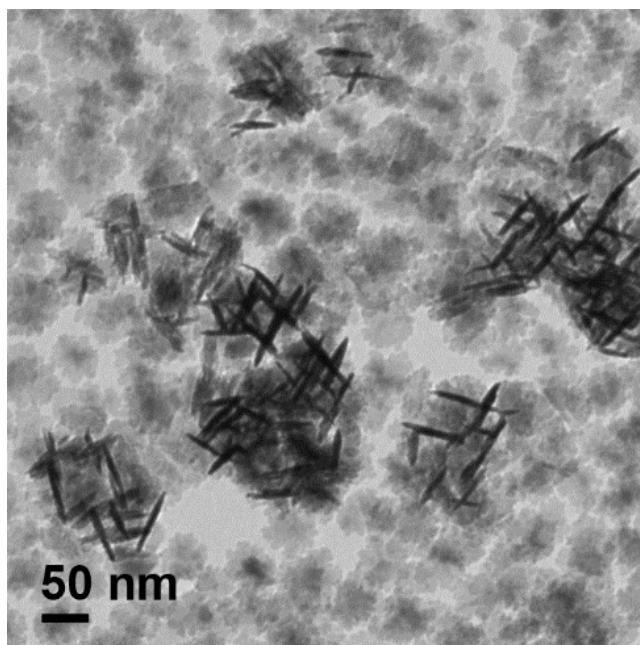

**Figure S11.** TEM image of the  $\text{LaF}_{3-2x}\text{O}_x$  nanoscrolls using  $\text{La}(\text{CF}_3\text{SO}_3)_3$ .

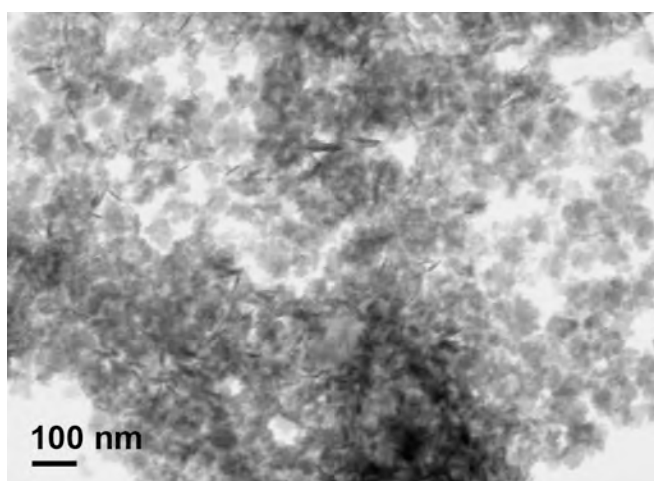

**Figure S12.** STEM image of the  $\text{LaF}_{3-2x}\text{O}_x$  nanoscrolls using  $\text{LaBr}_3$ .

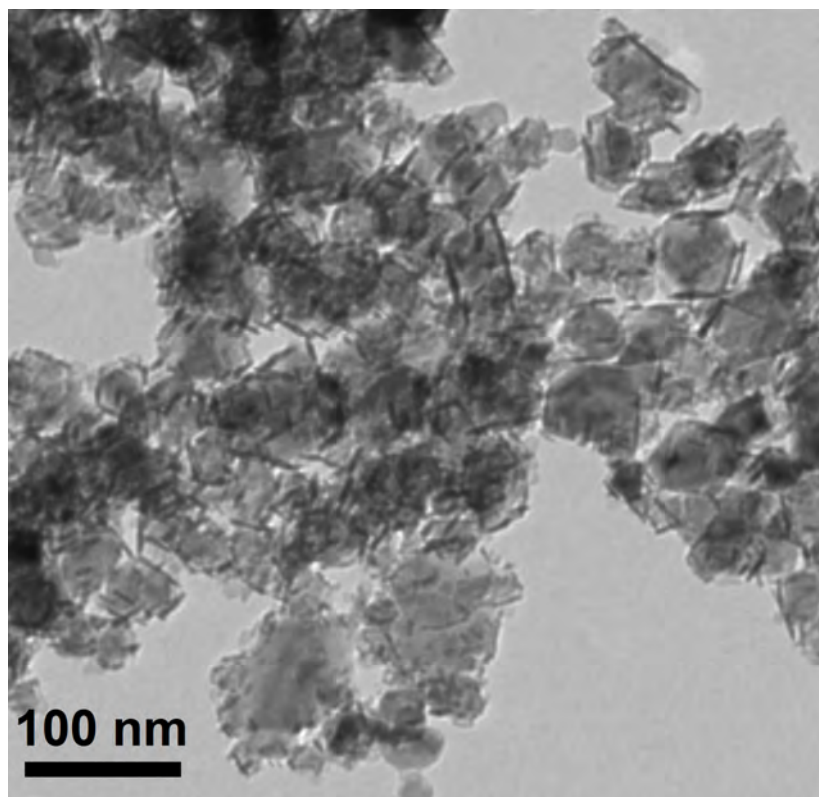

**Figure S13.** TEM image of partially scrolled nanosheets using sub-stoichiometric amount of  $\text{La}(\text{CF}_3\text{SO}_3)_3$ .

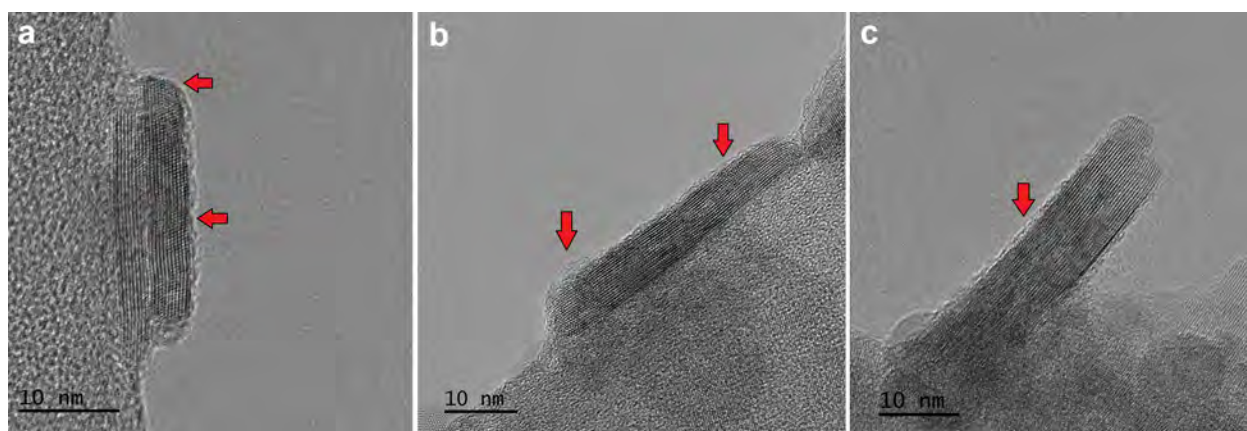

**Figure S14.** HRTEM images of partially rolled (a, c) and fully rolled nanoscrolls (b) highlighting their rolled-up nature and open ends. Arrows indicate areas where lattice fringes change from overlap due to curvature upon rolling.



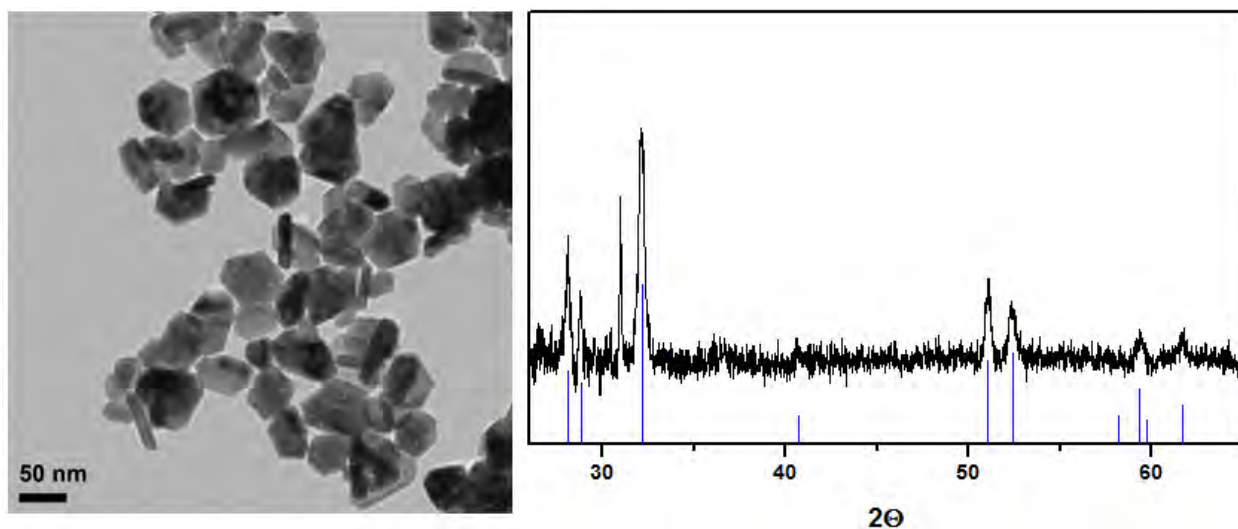

**Figure S15.** a) TEM image of  $\text{LaF}_3$  nanocrystals obtained from the hydrothermal reaction of  $\text{CaF}_2$  nanosheets with  $\text{LaCl}_3$  b) Experimental PXRD pattern (black) with reference pattern (blue sticks) matching hexagonal  $\text{LaF}_3$  (ICDD no. 04-005-4417).

**Table S3.** Quantitative EDS measurements on the  $\text{LaF}_{3-2x}\text{O}_x$  nanoscrolls.

| Element | Series   | Atomic % |
|---------|----------|----------|
| La      | K-series | 26.79    |
| F       | K-series | 52.38    |
| O       | K-series | 20.38    |
| Ca      | K-series | 0.44     |

**Table S4.** Peak values for XPS measurements.

| Sample                                                                | Element | Peak positions   |    |                  |                            |
|-----------------------------------------------------------------------|---------|------------------|----|------------------|----------------------------|
|                                                                       |         | 1s               | 2s | 2p               | 3d                         |
| <b><math>\text{LaF}_{1.955}\text{O}_{0.76}</math><br/>nanoscrolls</b> | La      | --               | -- | --               | 842.47<br>859.35<br>862.97 |
|                                                                       | F       | --               | -- | 705.01<br>706.28 | --                         |
|                                                                       | O       | 531.97<br>532.82 | -- | --               | --                         |
|                                                                       | Si      | --               | -- | 107.78<br>111.38 | --                         |
